# Supplementary material
Source: PubMed Central journal article supplement (PMC1913732)
Supplement: plntcell_tpc.106.047795_2.pdf [file plntcell_tpc.106.047795_2.pdf]

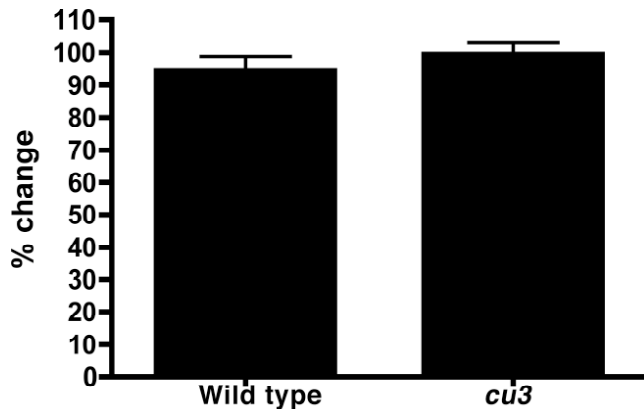

**Supplementary Figure 2: Ala-17 substituted systemin is biologically inactive**

*S. pimpinellifolium* and *cu3* seedlings were grown for 7 days on media with or without 10 nM Ala-17 substituted systemin and root length recorded 7 days later. Data is expressed as percentage change of untreated seedlings. Error bars indicate standard error from the mean.
