# Supplementary material
Source: PubMed Central journal article supplement (PMC1913732)
Supplement: plntcell_tpc.106.047795_4.pdf [file plntcell_tpc.106.047795_4.pdf]

|          |     |                                                                |     |
|----------|-----|----------------------------------------------------------------|-----|
| At BRL3  | 547 | KNLIWLDLNSNNITGNLFGELASOAG.LVMPGSVSGKQFAFVRNEGGT.DCRGAGGLVEFF  | 604 |
| At BRL1  | 547 | KSLIWLDLNSNNITGDLFGELASOAG.LVMPGSVSGKQFAFVRNEGGT.DCRGAGGLVEFF  | 604 |
| Os BRL1  | 598 | NNLIWLDLNSNFTGTFPPQLAGQAG.LVPGGIVSGKQFAFLRNEAGN.ICPGAGVLEFF    | 655 |
| Os BRL3  | 598 | SNLIWLDLNSNELTGTTFPQLAAQAG.LITGAIVSGKQFAFLRNEAGN.ICPGAGVLEFF   | 655 |
| Sl BRI1  | 571 | QSLIWLDLNTNFLNGSTPPPLFKQSG.NIAVALLTGKRYVYIKNDGSK.ECHGAGNLEFF   | 628 |
| Spi BRI1 | 571 | QSLIWLDLNTNFLNGSTPPPLFKQSG.NIAVALLTGKRYVYIKNDGSK.ECHGAGNLEFF   | 628 |
| Spv BRI1 | 571 | QSLIWLDLNTNFLNGSTPPPLFKQSG.NIAVALLTGKRYVYIKNDGSK.ECHGAGNLEFF   | 628 |
| St BRI1  | 570 | QSLIWLDLNTNFLNGSTPPPLFKQSG.NIAVALLTGKRYVYIKNDGSK.ECHGAGNLEFF   | 627 |
| Nb BRI1  | 579 | QSLIWLDLNTNLLNGSTPPPLFKQSG.NIAVALLTGKRYVYIKNDGSK.ECHGAGNLEFF   | 636 |
| Ps BRI1  | 558 | PSLIWLDLNTNFLTGTTPPELKGQSG.KVVVNFISGKTYVYIKNDGSK.ECHGAGSLEFF   | 615 |
| At BRI1  | 560 | RSLIWLDLNTNLFNGTTPAAMFKQSG.KIAANFIAGKRYVYIKNDGMKKECHGAGNLEFF   | 618 |
| Os BRI1  | 488 | QSLVWLDLNSNQLNGSTPKELAKQSG.KMNVGLIVGRPYVYLRNDELSSQCRGKGSLEFF   | 546 |
| Hv BRI1  | 485 | KSLVWLDLNSNQLNGSTPPPELAEQSG.KMTVGLIICRPYVYLRNDELSSQCRGKGSLEFF  | 543 |
| At BRL2  | 519 | TTLVWLDLNTNHLTGETPPRLGROPQSKALSGLLSENTMAFVRNVGNS..CRGVGGLVEFF  | 576 |
| Os BRL2  | 500 | SSLVWLDLNSNRLTGETPERRLGROLESTPLSGILSENTLAFVRNVGNS..CRGVGGLVEFF | 557 |

|          |     |                                                                  |     |
|----------|-----|------------------------------------------------------------------|-----|
|          |     | ****                                                             |     |
| At BRL3  | 605 | EGIRAEERLEHFPMVHSCPKT.RIYSGMTMYFSSNGSMIYLDLSYNAVSGSTFLGYCAMG     | 663 |
| At BRL1  | 605 | EGIRAEERLERLPMVHSCPAT.RIYSGMTMYTFSSANGSMIYFDLSYNAVSGFTIPPGYENMG  | 663 |
| Os BRL1  | 656 | FGIRPERLAEFPAVHLCPST.RIYTGTTVYTFNNGSMIFLDLSYNGITGTIPGSLGNMM      | 714 |
| Os BRL3  | 656 | LDIRPDRLANFPAVHLCSST.RIYTGTTVYTFERNNGSMIFLDLSYNSLTGTIPASFENMT    | 714 |
| Sl BRI1  | 629 | GGIRQEQLDRISTRHPCNFT.RVYRGTIQPTFNHNGSMIFLDLSYNKLEGSTPKELCAMY     | 687 |
| Spi BRI1 | 629 | GGIRQEQLDRISTRHPCNFT.RVYRGTIQPTFNHNGSMIFLDLSYNKLEGSTPKELCAMY     | 687 |
| Spv BRI1 | 629 | GGIRQEQLDRISTRHPCNFT.RVYRGTIQPTFNHNGSMIFLDLSYNKLEGSTPKELCAMY     | 687 |
| St BRI1  | 628 | GGIRQEQLGRISTRHPCNFT.RVYRGTIQPTFNHNGSMIFLDLSYNKLEGSTPKELCAMY     | 686 |
| Nb BRI1  | 637 | GGIRQEQLDRISTRHPCNFT.RVYRGTIQPTFNHNGSMIFLDLSYNKLEGSTPKELCSMY     | 695 |
| Ps BRI1  | 616 | AGINQEQLRRISTRNPCNFT.RVYGGKLPQPTFLNGSMIFLDVSHNMLSGTIPKEIGEMT     | 674 |
| At BRI1  | 619 | QGIRSEQLNRLSTRNPNITSRVYGGHTSPTFDNNGSMIFLDMSYNNMLSGYTPKEIGSMP     | 678 |
| Os BRI1  | 547 | TSIRPDDL SRMP SKKLCNFT.RMYVGS TEYTFNKNGSMIFLDLSYNSQLDSAIPGELGDMF | 605 |
| Hv BRI1  | 544 | SSIRSEDL SRMP SKKLCNFT.RMYMGS TEYTFNKNGSMIFLDLSFNQLDSEIPKELGNMF  | 602 |
| At BRL2  | 577 | SGIRPERLLQIPSLKSCDFT.RMYSGLPILSLFTRYQTIEYLDLSYNSQLRGKIPDEIGEMI   | 635 |
| Os BRL2  | 558 | AGIRPERLLQVPTLKSCDFT.RLYSCAAVSGWTRYQTLEYLDLSYNSLDGELFEELGDMV     | 616 |

#### Supplementary Figure 4: Sequence alignment of the BL binding region of BRI1 and related proteins

The sequence alignment encompasses the BL binding region of At BRI1 (amino acids 580-673). Sequences present in the alignment are (numbers in parenthesis indicate Genbank accession numbers): At BRL3 (Q9LJF3); At BRL1 (Q9ZWC8); Os BRL1 (NP\_001062792); Os BRL3 (BAD01717); Sl BRI1 (Q8GUQ5); Spi BRI1 (ABO27626); Spv BRI1; (Q8L899); St BRI1 (ABO27627); Nb BRI1 (ABO27628); Ps BRI1 (BAC99050); At BRI1 (O22476); Os BRI1 (NP\_001044077); Hv BRI1 (BAD06331); At BRL2 (Q9ZPS9); Os BRL2 (AAK52544). At, *Arabidopsis thaliana*; Os, *Oryza sativa*; Sl, *Solanum Lycopersicum*; Spi, *Solanum pimpinellifolium*; Spv, *Solanum peruvianum*; St, *Solanum tuberosum*; Nb, *Nicotiana benthamiana*; Ps, *Pisum sativum*; Hv, *Hordeum vulgare*. Amino acids highlighted in black are identical in all sequences and those highlighted in grey are conserved. The NGSM motif conserved in BL responsive proteins is indicated by asterisks.
